# Supplementary material for: Effect of Intragastric Botulinum Type A Injection Combined with a Low-Calorie High-Protein Diet in Adults with Overweight or Obesity
Source: MDPI journal article supplement (doi:10.3390/jcm11123325), 2022-06-10
Supplement: s1 [file s1]

Supplementary Figure S1. Endoscopic injection of botulinum toxin in the antrum of stomach

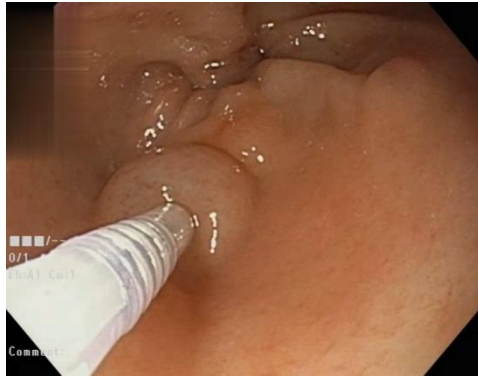

Method:

Inject 30ml of botulinum type A (Botox; Allergan, Irvine, CA) containing 300 units in 0.9% normal saline through a 25-gauge needle, and inject 10ml each on antrum, body, and fundus through submucosal injection.

**Supplementary Table S1** – Multivariate logistic regression analysis of factors associated with weight loss more than 5% in IGBI group, adjusted for sex and age

| Variable                 | IGBI                |         |
|--------------------------|---------------------|---------|
|                          | Adjusted OR (95%CI) | P-value |
| Weight (kg)              | 1.0(0.95-1.10)      | 0.431   |
| BMI (kg/m <sup>2</sup> ) | 0.9(0.69-1.22)      | 0.588   |
| HBA1c (%)                | 0.6(0.11-3.55)      | 0.604   |
| Cholesterol (mg/dL)      |                     |         |
| Total                    | 1.0(0.96-1.17)      | 0.237   |
| HDL cholesterol          | 0.9(0.82-1.01)      | 0.089   |
| LDL cholesterol          | 0.9(0.86-1.05)      | 0.345   |
| Triglycerides (mg/dL)    | 0.9(0.98-1.01)      | 0.550   |

OR: Odds ratio; 95%CI: 95% confidence interval; IGBI: Intragastric botulinum injection
